# Supplementary material for: Copper-mediated aerobic oxidative synthesis of benzimidazo fused quinazolines via a multicomponent approach
Source: Royal Society of Chemistry journal article supplement (doi:10.1039/c5ra15525h), 2015-01-01
Supplement: c5ra15525h1.pdf [file c5ra15525h1.pdf]

## Supporting Information

### **An efficient copper-mediated aerobic oxidative Synthesis of Benzimidazo Fused quinazolines**

Byanju Rai<sup>a</sup>, Promod Kumar<sup>a</sup> and Atul Kumar<sup>\*a,b</sup>

<sup>a</sup>*Medicinal and Process Chemistry Division, CSIR-Central Drug Research Institute(CDRI),Lucknow, 226031, India*

<sup>b</sup>*Academy of Scientific & Innovative Research (AcSIR) , New Delhi, India.*

*E-mail: dratulsax@gmail.com; atul\_kumar@cdri.res.in, Fax: +91-522-26 234051; Tel: +91-522-26 12411*

#### **Contents:**

|                                                                              |      |
|------------------------------------------------------------------------------|------|
| 1. General Considerations                                                    | 1    |
| 2. General Synthesis of of 2-(2-halophenyl)-1H-benzo[d]imidazole derivatives | 2    |
| 3. General Method for the Preparation of benzimidazo [1,2-c]quinazolines     | 2    |
| 4.Optimization table                                                         | 3    |
| 4. Characterization data for synthesized compounds                           | 4-8  |
| 5.Copies of <sup>1</sup> H and <sup>13</sup> C NMR                           | 9-22 |

#### **1. General Considerations**

All the reagents and solvents were purchased from Sigma-Aldrich or Merck chemical Co. and were used directly without any further purification. Organic solvents were concentrated under reduced pressure on a Büchi rotary evaporator. The progress of reaction was checked by thin-layer chromatography. The plates were visualized first with UV illumination followed by iodine. <sup>1</sup>H NMR spectra were recorded at 300 or 400 MHz using Bruker DRX-300, or 400 spectrometer and are reported in parts per million (ppm) on the  $\delta$  scale relative to TMS as an internal standard. Coupling constants (*J*) reported in Hz. <sup>13</sup>C NMR spectra were recorded at 50, 75 or 100 MHz. Mass spectra were obtained using JEOL SX-102 (ESI) instrument. Elemental analysis was performed using a Perkin-Elmer autosystem XL analyzer.

## **2. General procedure for the synthesis of 2-(2-halophenyl)-1H-benzo[d]imidazole derivatives**

2-Halobenzoic acid (10.0 mmol) and substituted 1,2-phenylenediamine (10.0 mmol) were added to a flask charged with polyphosphoric acid (PPA) (20.0 g) and the mixture was stirred at 160 °C for 10 h. The reaction solution was poured into crushed ice and neutralized with ice-cold NaHCO<sub>3</sub> aqueous solution till no gas was released. The reaction mass was then extracted with ethyl acetate (2 x 50 ml) and dried over anhydrous magnesium sulfate and concentrated. The crude compound was purified by recrystallisation from hot aq. ethanol to obtain pure desired solid product.

## **3. General Method for the Preparation of benzimidazo [1,2-c]quinazolines**

A 50 flask equipped with a magnetic stirring bar charged with 2-(2-halophenyl)-1H-benzoimidazole (1.0 mmol), benzaldehyde (1.2 mmol), NaN<sub>3</sub> (2.0 mmol), Cu-powder (10 mol%), L-proline (20 mol%), and Cs<sub>2</sub>CO<sub>3</sub>(1.0 mmol) were taken in 4.0 mL of DMSO. The reaction mixture was heated to 80 °C for 12 h under air atmosphere. After cooling, the mixture was poured into the EtOAc (50.0 mL), washed with brine (25.0 mL) and water (2 × 25.0 mL), dried over MgSO<sub>4</sub>, and passed through a Celite. Evaporation of the solvent under reduced pressure provided the crude product, which was purified by column chromatography.

**Table 1. Optimization of reaction conditions for the syn-thesis of Benzimidazo [1,2-c]quinazoline**

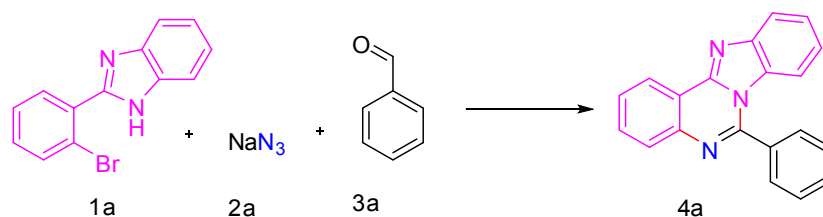

| Entry    | Catalyst             | Ligand   | Base                                | Solvent                                    | Yield <sup>b</sup> |
|----------|----------------------|----------|-------------------------------------|--------------------------------------------|--------------------|
| 1        | CuI                  | A        | Cs <sub>2</sub> CO <sub>3</sub>     | DMSO                                       | 70                 |
| 2        | CuBr                 | A        | Cs <sub>2</sub> CO <sub>3</sub>     | DMSO                                       | 64                 |
| 3        | CuCl                 | A        | Cs <sub>2</sub> CO <sub>3</sub>     | DMSO                                       | 60                 |
| 4        | Cu(OAc) <sub>2</sub> | A        | Cs <sub>2</sub> CO <sub>3</sub>     | DMSO                                       | 40                 |
| 5        | -                    | A        | Cs <sub>2</sub> CO <sub>3</sub>     | DMSO                                       | 0                  |
| <b>6</b> | <b>Cu powder</b>     | <b>A</b> | <b>Cs<sub>2</sub>CO<sub>3</sub></b> | <b>DMSO</b>                                | <b>89</b>          |
| 7        | Cu powder            | B        | Cs <sub>2</sub> CO <sub>3</sub>     | DMSO                                       | 55                 |
| 8        | Cu powder            | C        | Cs <sub>2</sub> CO <sub>3</sub>     | DMSO                                       | 50                 |
| 9        | Cu powder            | D        | Cs <sub>2</sub> CO <sub>3</sub>     | DMSO                                       | 35                 |
| 10       | Cu powder            | E        | Cs <sub>2</sub> CO <sub>3</sub>     | DMSO                                       | 58                 |
| 11       | Cu powder            | A        | Cs <sub>2</sub> CO <sub>3</sub>     | DMF                                        | 76                 |
| 12       | Cu powder            | A        | K <sub>2</sub> CO <sub>3</sub>      | DMSO                                       | 40                 |
| 13       | Cu powder            | A        | K <sub>3</sub> PO <sub>4</sub>      | DMSO                                       | 50                 |
| 14       | Cu powder            | A        | Cs <sub>2</sub> CO <sub>3</sub>     | CH <sub>3</sub> CN                         | 44                 |
| 15       | Cu Powder            | A        | Cs <sub>2</sub> CO <sub>3</sub>     | DMSO:CH <sub>2</sub> Cl <sub>2</sub> (1:3) | 16                 |
| 16.      | Cu powder            | A        | Cs <sub>2</sub> CO <sub>3</sub>     | DMSO:CH <sub>2</sub> Cl <sub>2</sub> (3:1) | 64                 |

<sup>a</sup>Reaction conditions: 2-(2-bromophenyl)-1H-benzimidazole (1.0 mmol), Benzaldehyde (1.2 mmol), Sodium azide (2.0 mmol), Cu catalyst (10 mol%), Ligand (20 mol%), and Base (1.0 mmol) in solvents (4-5 mL), at 80 °C for 12hr. <sup>b</sup>Isolated yield

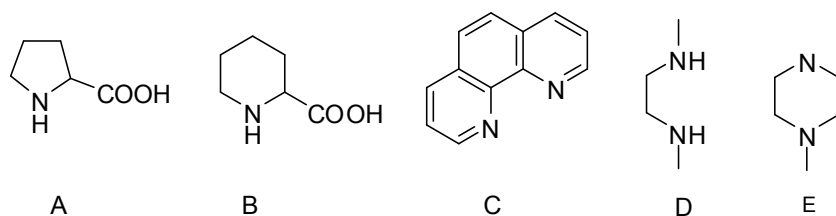

### Ligands Screened

#### 4. Characterization data for synthesized compounds

##### 6-phenylbenzo[4,5]imidazo[1,2-c]quinazoline(4a)<sup>1,2</sup>

Physical state: White solid; Yield 89%; mp 166-168 °C; <sup>1</sup>H NMR (400 MHz, CDCl<sub>3</sub>) δ<sub>H</sub>: 8.71 (d, *J* = 7.8 Hz, 1H), 7.95 (d, *J* = 8.0 Hz, 2H), 7.76 (d, *J* = 8.2 Hz, 1H), 7.68 (t, *J* = 7.2 Hz, 1H), 7.64 (d, *J* = 1.6 Hz, 2H), 7.56-7.50 (m, 3H), 7.44 (t, *J* = 7.6 Hz, 1H), 7.13 (t, *J* = 7.6 Hz, 1H), 6.64 (d, *J* = 8.3 Hz, 1H); <sup>13</sup>C NMR (75 MHz, CDCl<sub>3</sub>) δ<sub>C</sub>: 148.5, 148.0, 144.4, 142.4, 134.3, 131.9, 131.0, 129.3, 129.2, 128.4, 128.3, 128.2, 125.6, 124.2, 122.6, 120.0, 118.4, 114.4; Molecular formula- C<sub>20</sub>H<sub>13</sub>N<sub>3</sub>; ESI-MS (*m/z*): 296 (M+H)<sup>+</sup>; Analysis calculated for C<sub>20</sub>H<sub>13</sub>N<sub>3</sub>: C 81.34, H 4.44, N 14.23, Found: C 81.30, H 4.45, N 14.25.

##### 4-(benzo[4,5]imidazo[2,1-a]isoquinolin-6-yl)-N,N-dimethylaniline (4b)

Physical state: White solid; Yield 88%; mp 172-174 °C; <sup>1</sup>H NMR (400 MHz, DMSO-*d*<sub>6</sub>) δ<sub>H</sub>: 8.66-8.64 (m, 1H), 7.91 (d, *J* = 8.2 Hz, 2H), 7.71-7.67 (m, 1H), 7.60-7.56 (m, 3H), 7.41-7.37 (m, 1H), 7.11-7.06 (m, 1H), 6.98 (d, *J* = 8.4 Hz, 1H), 6.80 (d, *J* = 8.8 Hz, 2H), 3.04 (s, 6H); <sup>13</sup>C NMR (75 MHz, CDCl<sub>3</sub>) δ<sub>C</sub>: 152.4, 149.4, 148.6, 144.4, 142.8, 131.7, 129.7, 128.0, 127.6, 125.4, 124.1, 122.2, 121.28, 119.8, 118.1, 115.0, 111.8, 40.3; Molecular formula- C<sub>22</sub>H<sub>18</sub>N<sub>4</sub>; ESI-MS (*m/z*): 339 (M+H)<sup>+</sup>; Analysis calculated for C<sub>22</sub>H<sub>18</sub>N<sub>4</sub>: C 78.08, H 5.36, N 16.56, Found: C 78.05, H 5.42, N 16.58.

##### 2,4-dichlorophenylbenzo[4,5]imidazo[2,1-a]isoquinoline(4c)

Physical state: White solid; Yield 75%; mp > 250 °C; <sup>1</sup>H NMR (400 MHz, CDCl<sub>3</sub>) δ<sub>H</sub>: 8.71 (d, *J* = 7.8 Hz, 1H), 7.95 (d, *J* = 8.0 Hz, 2H), 7.78-7.74 (m, 1H), 7.70-7.63 (m, 2H), 7.57-7.51 (m, 2H), 7.44 (t, *J* = 7.6 Hz, 1H), 7.13 (t, *J* = 7.6 Hz, 1H), 6.44 (d, *J* = 8.3 Hz, 1H); <sup>13</sup>C NMR (75 MHz, CDCl<sub>3</sub>) δ<sub>C</sub>: 147.5, 144.9, 144.3, 142.1, 137.8, 134.5, 132.2, 132.0, 131.3, 130.3, 128.9, 128.8, 128.4, 128.4, 125.9, 124.3, 123.4, 120.2, 118.7, 112.8; Molecular formula- C<sub>21</sub>H<sub>11</sub>Cl<sub>2</sub>N<sub>2</sub>; ESI-MS (*m/z*): 364 (M+H)<sup>+</sup>; Analysis calculated for C<sub>20</sub>H<sub>11</sub>Cl<sub>2</sub>N<sub>3</sub>: C 65.95, H 3.04, N 11.54, Found: C 65.91, H 3.05, N 11.58.

##### 6-(naphthalen-1-yl)benzo[4,5]imidazo[1,2-c]quinazoline (4d)

Physical state: White solid; Yield 94%; mp > 250 °C; <sup>1</sup>H NMR (400 MHz, CDCl<sub>3</sub> *d*<sub>6</sub>) δ<sub>H</sub>: 8.84 (d, *J* = 7.6 Hz, 1H), 8.21 (d, *J* = 7.9 Hz, 1H), 8.05 (t, *J* = 9.0 Hz, 2H), 7.96 (d, *J* = 7.6

Hz, 1H), 7.87-7.72 (m, 4H), 7.55 (t,  $J = 7.2$  Hz, 1H), 7.48 (d,  $J = 8.3$  Hz, 1H), 7.37 (d,  $J = 6.3$  Hz, 2H), 6.87 (t,  $J = 7.6$  Hz, 1H), 5.93 (d,  $J = 8.4$  Hz, 1H);  $^{13}\text{C}$  NMR (75 MHz,  $\text{CDCl}_3$ )  $\delta_{\text{c}}$ : 147.8, 147.6, 144.3, 142.5, 133.7, 131.9, 131.6, 131.1, 130.7, 129.0, 128.7, 128.5, 128.4, 127.8, 127.0, 126.9, 125.7, 125.6, 124.4, 124.3, 122.9, 119.8, 118.6, 113.9; Molecular formula-  $\text{C}_{24}\text{H}_{15}\text{N}_3$ ; ESI-MS ( $m/z$ ): 346 ( $\text{M}+\text{H}$ ) $^+$ ; Analysis calculated for  $\text{C}_{24}\text{H}_{15}\text{N}_3$ : C 83.46, H 4.38, N 12.17, Found: C 83.43, H 4.40, N 12.18.

#### **4-nitrophenyl)benzo[4,5]imidazo[1,2-c]quinazoline (4e)**

Physical state: Yellow solid; 65%; mp 240-242 °C;  $^1\text{H}$  NMR (300 MHz,  $\text{CDCl}_3$ )  $\delta_{\text{H}}$ : 8.80 (d,  $J = 7.6$  Hz, 1H), 8.56 (d,  $J = 7.5$  Hz, 2H), 8.03 (t,  $J = 7.2$  Hz, 4H), 7.86 (t,  $J = 7.3$  Hz, 1H), 7.78 (t,  $J = 7.8$  Hz, 1H), 7.54 (t,  $J = 7.4$  Hz, 1H), 7.20 (t,  $J = 8.1$  Hz, 1H), 6.69 (d,  $J = 8.4$  Hz, 1H);  $^{13}\text{C}$  NMR (75 MHz,  $\text{CDCl}_3 + \text{DMSO-}d_6$ )  $\delta_{\text{c}}$ : 149.2, 144.2, 140.2, 132.4, 130.6, 129.0, 128.4, 125.9, 124.6, 124.2, 123.1, 120.0, 118.6, 114.2; Molecular formula-  $\text{C}_{20}\text{H}_{12}\text{N}_4\text{O}_2$ ; ESI-MS ( $m/z$ ): 341 ( $\text{M}+\text{H}$ ) $^+$ ; Analysis calculated for  $\text{C}_{20}\text{H}_{12}\text{N}_4\text{O}_2$ : C 70.58, H 3.55, N 16.46, Found: C 70.59, H 3.50, N 16.50.

#### **6-(2,5-dimethoxyphenyl)benzo[4,5]imidazo[1,2-c]quinazoline (4f)**

Physical state: White solid; Yield 82%; mp > 250 °C;  $^1\text{H}$  NMR (300 MHz,  $\text{DMSO-}d_6$ )  $\delta_{\text{H}}$ : 8.66 (d,  $J = 7.9$  Hz, 1H), 8.00-7.89 (m, 3H), 7.81 (t,  $J = 7.5$  Hz, 1H), 7.61 (t,  $J = 7.3$  Hz, 1H), 7.31 (s, 3H), 7.22 (t,  $J = 7.8$  Hz, 1H), 6.50 (d,  $J = 8.3$  Hz, 1H), 3.80 (s, 3H), 3.55 (s, 3H);  $^{13}\text{C}$  NMR (75 MHz,  $\text{DMSO-}d_6$ )  $\delta_{\text{c}}$ : 154.0, 151.4, 147.3, 146.5, 144.2, 142.5, 132.5, 129.4, 128.9, 128.4, 125.9, 124.2, 124.0, 123.3, 120.0, 118.5, 117.9, 115.7, 113.5, 56.5, 56.2; Molecular formula-  $\text{C}_{22}\text{H}_{17}\text{N}_3\text{O}_2$ ; ESI-MS ( $m/z$ ): 356 ( $\text{M}+\text{H}$ ) $^+$ ; Analysis calculated for  $\text{C}_{22}\text{H}_{17}\text{N}_3\text{O}_2$ : C 74.35, H 4.82, N 11.82, Found: C 74.38, H 4.83, N 11.85.

#### **6-(3,5-dimethoxyphenyl)benzo[4,5]imidazo[1,2-c]quinazoline (4g)**

Physical state: Light yellow solid; Yield 85%; mp > 250 °C;  $^1\text{H}$  NMR (300 MHz,  $\text{CDCl}_3$ )  $\delta_{\text{H}}$ : 8.76 (d,  $J = 7.9$  Hz, 1H), 8.01 (t,  $J = 7.7$  Hz, 2H), 7.81 (t,  $J = 7.3$  Hz, 1H), 7.72 (t,  $J = 7.7$  Hz, 1H), 7.49 (t,  $J = 7.6$  Hz, 1H), 7.18 (t,  $J = 7.9$  Hz, 1H), 6.85 (s, 2H), 6.76 (d,  $J = 7.8$  Hz, 2H), 3.85 (s, 6H);  $^{13}\text{C}$  NMR (75 MHz,  $\text{CDCl}_3$ )  $\delta_{\text{c}}$ : 161.6, 148.2, 147.9, 144.4, 142.3, 135.8, 131.9, 129.2, 128.3, 125.7, 124.2, 122.8, 119.9, 118.5, 114.6, 106.1, 103.4, 55.7; Molecular

formula-  $C_{22}H_{17}N_3O_2$ ; ESI-MS (m/z): 356 (M+H)<sup>+</sup>; Analysis calculated for  $C_{22}H_{17}N_3O_2$ : C 74.35, H 4.82, N 11.82, Found: C 74.30, H 4.84, N 11.85.

#### **6-(2,4,5-trimethoxyphenyl)benzo[4,5]imidazo[1,2-c]quinazoline(4h)**

Physical state: Yellow solid; Yield 80%; mp > 250 °C; <sup>1</sup>H NMR (300 MHz, DMSO-d<sub>6</sub>) δ<sub>H</sub>: 8.65 (d, *J* = 7.6 Hz, 1H), 7.99-7.87 (m, 3H), 7.79 (t, *J* = 4.4Hz, 1H), 7.50 (t, *J* = 7.5Hz, 1H), 7.25 (t, *J* = 7.0Hz, 3H), 6.57 (d, *J* = 8.4Hz, 1H), 3.85 (s, 3H), 3.79(s, 6H); <sup>13</sup>C NMR (75 MHz, DMSO-d<sub>6</sub>) δ<sub>C</sub>: 158.6, 153.3, 152.5, 149.1, 147.2, 144.4, 137.2, 134.6, 134.3, 133.5, 133.0, 130.6, 129.0, 127.8, 124.7, 123.3, 119.4, 111.2, 65.7, 61.5; Molecular formula-  $C_{23}H_{19}N_3O_3$ ; ESI-MS (m/z): 386(M+H)<sup>+</sup>; Analysis calculated for  $C_{23}H_{19}N_3O_3$ : C 71.67, H 4.97, N 10.90, Found: C 71.69, H 5.00, N 10.85.

#### **4-(benzo[4,5]imidazo[1,2-c]quinazolin-6-yl)phenol (4i)**

Physical state: white solid; Yield 79%; mp 174-176 °C; <sup>1</sup>H NMR (400 MHz, DMSO-d<sub>6</sub>) δ<sub>H</sub>: 10.17 (s, 1H), 8.63-8.61 (m, 1H), 7.95-7.92 (m, 2H), 7.89-7.85 (m, 1H), 7.77-7.73 (m, 1H), 7.65-7.62 (m, 2H), 7.49-7.45 (m, 1H), 7.22-7.18 (m, 1H), 7.06-7.03 (m, 2H), 6.69 (d, *J* = 8.4Hz, 1H); <sup>13</sup>C NMR (75 MHz, DMSO-d<sub>6</sub>) δ<sub>C</sub>: 160.0, 149.2, 148.0, 144.4, 142.6, 132.3, 130.6, 129.7, 128.4, 128.2, 125.7, 125.3, 124.2, 122.7, 120.0, 118.4, 116.1, 114.7.; Molecular formula-  $C_{20}H_{13}N_3O$ ; ESI-MS (m/z): 312(M+H)<sup>+</sup>; Analysis calculated for  $C_{20}H_{13}N_3O$ : C 77.16, H 4.21, N 13.50, Found: C 77.20, H 4.23, N 13.45.

#### **6-(3,4,5-trimethoxyphenyl)benzo[4,5]imidazo[1,2-c]quinazoline (4j)**

Physical state: White solid; Yield 81%; mp >250 °C; <sup>1</sup>H NMR (300 MHz, CDCl<sub>3</sub>) δ<sub>H</sub>: 8.78 (d, *J* = 7.0 Hz, 1H), 8.03 (d, *J* = 3.0 Hz, 2H), 7.84 (t, *J* = 3.6 Hz, 1H), 7.52 (t, *J* = 7.2 Hz, 1H), 7.25 (d, *J* = 7.2 Hz, 1H), 7.21(t, *J* = 4.9 Hz, 1H), 6.98 (s, 2H), 6.81 (d, *J* = 8.3 Hz, 1H), 4.62 (s, 3H), 3.91 (s, 6H); <sup>13</sup>C NMR (100 MHz, DMSO-d<sub>6</sub>) δ<sub>C</sub>: 153.9, 148.6, 142.5, 132.4, 129.9, 129.6, 128.7, 128.3, 125.8, 124.2, 123.0, 120.0, 114.7, 106.5, 60.9, 56.7; Molecular formula-  $C_{23}H_{19}N_3O_3$ ; ESI-MS (m/z): 386 (M+H)<sup>+</sup>; Analysis calculated for  $C_{23}H_{19}N_3O_3$ : C 71.67, H 4.97, N 10.90, Found: C 71.69, H 4.98, N 10.92.

#### **9-nitro-6-(2,4,5-trimethoxyphenyl)benzo[4,5]imidazo[1,2-c]quinazoline(4k)**

Physical state: White solid; Yield 65%; mp > 250 °C; <sup>1</sup>H NMR (400 MHz, DMSO-d<sub>6</sub>) δ<sub>H</sub>: 8.74(d, *J* = 2.3 Hz, 1H), 8.68-8.66 (m, 1H), 8.15-8.13 (m, 1H), 8.01-7.93 (m, 2H), 7.85-7.81(m,1H), 7.23 (s, 2H), 6.75 (d, *J* = 9.7 Hz, 1H), 3.87 (s, 3H), 3.80 (s, 6H); <sup>13</sup>C NMR (100 MHz, DMSO-d<sub>6</sub>) δ<sub>C</sub>: 154.0, 150.9, 148.3, 145.3, 143.9, 142.6, 140.0, 133.7, 133.4, 129.3, 129.2, 128.5, 124.6, 118.0, 115.4, 106.6, 60.9, 56.1.; Molecular formula- C<sub>23</sub>H<sub>18</sub>N<sub>4</sub>O<sub>5</sub>; ESI-MS (m/z): 431 (M+H)<sup>+</sup>; Analysis calculated for C<sub>23</sub>H<sub>18</sub>N<sub>4</sub>O<sub>5</sub>: C 64.18, H 4.22, N 13.02, Found: C 64.19, H 4.21, N 13.05.

#### **4-(benzo[4,5]imidazo[1,2-c]quinazolin-6-yl)benzonitrile (4l)**

Physical state: White solid; 60%, mp 230-232 °C; <sup>1</sup>H NMR (300 MHz, DMSO-d<sub>6</sub>) δ<sub>H</sub>: 8.39-8.32 (m, 3H), 7.88 (d, *J* = 7.7Hz, 1H), 7.67 (t, *J* = 7.4Hz, 2H), 7.56-7.36 (m, 6H); <sup>13</sup>C NMR (75 MHz, DMSO-d<sub>6</sub>) δ<sub>C</sub>: 147.4, 146.3, 143.3, 136.9, 132.0, 131.4, 130.4, 128.4, 124.7, 124.2, 123.4, 123.1, 118.9, 115.6, 114.5, 111.5; Molecular formula-C<sub>21</sub>H<sub>12</sub>N<sub>4</sub>; ESI-MS (m/z): 321 (M+H); Analysis calculated for C<sub>21</sub>H<sub>12</sub>N<sub>4</sub>: C 78.73, H 3.78, N 17.49, Found: C 78.76, H 3.77, N 17.47.

#### **9-nitro-6-(3,4,5-trimethoxyphenyl)benzo[4,5]imidazo[1,2-c]quinazoline(4m)**

Physical state: White solid; Yield 61%; mp >250 °C; <sup>1</sup>H NMR (400 MHz, CDCl<sub>3</sub>) δ<sub>H</sub>: 8.32(d, *J* = 7.2 Hz, 1H), 8.31-8.07 (m, 1H), 7.76-7.71 (m, 1H), 7.46-7.32 (m, 4H), 6.54 (s, 2H), 3.75 (s, 9H); <sup>13</sup>C NMR (75 MHz, CDCl<sub>3</sub>) δ<sub>C</sub>: 153.3, 152.7, 148.8, 143.7, 143.1, 137.3, 134.2, 133.2, 131.6, 128.1, 128.0, 126.4, 119.2, 118.5, 115.9, 111.7, 109.0, 105.0, 60.9, 56.1; Molecular formula- C<sub>23</sub>H<sub>18</sub>N<sub>4</sub>O<sub>5</sub>; ESI-MS (m/z): 431 (M+H)<sup>+</sup>; Analysis calculated for C<sub>23</sub>H<sub>18</sub>N<sub>4</sub>O<sub>5</sub>: C 64.18, H 4.22, N 13.02, Found: C 64.19, H 4.24, N 13.06.

#### **6-(4-chlorophenyl)benzo[4,5]imidazo[1,2-c]quinazoline(4n)**

Physical state: White solid; Yield 79%; mp 234-236 °C; <sup>1</sup>H NMR (300 MHz, CDCl<sub>3</sub>) δ<sub>H</sub>: 8.68 (d, *J* = 8.2 Hz, 1H), 7.95-7.91 (m, 2H), 7.74 (t, *J* = 6.9 Hz, 1H), 7.65 (d, *J* = 8.6 Hz, 3H), 7.58 (d, *J* = 8.4 Hz, 2H), 7.42 (t, *J* = 7.5 Hz, 1H), 7.34 (t, *J* = 6.9 Hz, 1H), 7.10 (t, *J* = 7.6 Hz, 1H), 6.67 (d, *J* = 8.4 Hz, 1H); <sup>13</sup>C NMR (75 MHz, CDCl<sub>3</sub>) δ<sub>C</sub>: 142.3, 137.3, 132.0, 130.0, 129.6, 129.0, 128.5, 128.2, 125.8, 124.3, 122.7, 120.2, 118.4, 114.2; Molecular formula- C<sub>20</sub>H<sub>12</sub>ClN<sub>3</sub>; ESI-MS (m/z): 330 (M+H)<sup>+</sup>; Analysis calculated for C<sub>20</sub>H<sub>12</sub>ClN<sub>3</sub>: C 72.84, H 3.67, N 12.74, Found: C 72.80, H 3.68, N 12.77.

### 9-nitro-6-phenylbenzo[4,5]imidazo[1,2-c]quinazoline (4o)

Physical state: White solid; Yield 74%; mp 242-244 °C; <sup>1</sup>H NMR (400 MHz, CDCl<sub>3</sub>) δ<sub>H</sub>: 8.84 (d, *J* = 2.0 Hz, 1H), 8.77 (d, *J* = 7.8 Hz, 1H), 8.05-7.99 (m, 2H), 7.88 (t, *J* = 8.2 Hz, 1H), 7.79-7.68 (m, 6H), 6.68 (d, *J* = 9.2 Hz, 1H); <sup>13</sup>C NMR (75 MHz, DMSO-d<sub>6</sub>) δ<sub>C</sub>: 153.3, 152.7, 148.8, 143.7, 143.1, 137.3, 134.2, 133.2, 131.6, 128.1, 128.0, 126.4, 119.2, 118.5, 115.9, 111.6, 109.0, 105.0, 60.9, 56.1; Molecular formula- C<sub>20</sub>H<sub>12</sub>N<sub>4</sub>O<sub>2</sub>; ESI-MS (m/z): 341 (M+H)<sup>+</sup>; Analysis calculated for C<sub>20</sub>H<sub>12</sub>N<sub>4</sub>O<sub>2</sub>: C 70.58, H 3.55, N 16.46, Found: C 70.54, H 3.56, N 16.49.

### REFERENCES

1. Xu, S.; Lu, J.; Fu, H. *Chem. Commun.* **2011**, *47*, 5596.
2. Sang, P.; Xie, Y.; Zou, J.; Zhang, Y. *Org. Lett.* **2012**, *15*, 3895.



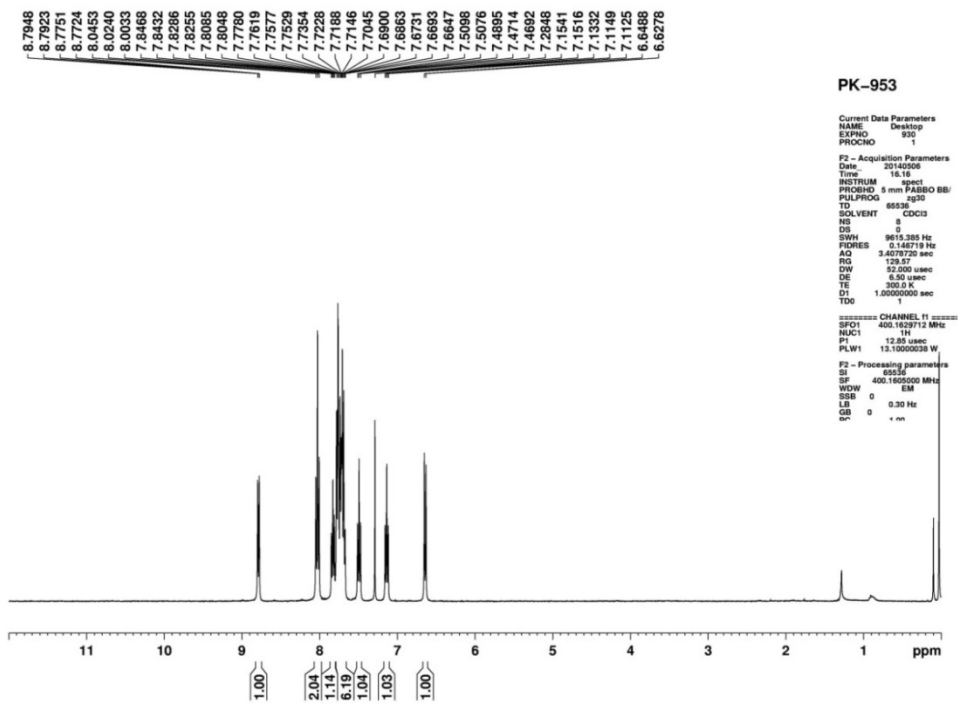

Figure 3:  $^1\text{H}$  NMR of compound (4a)

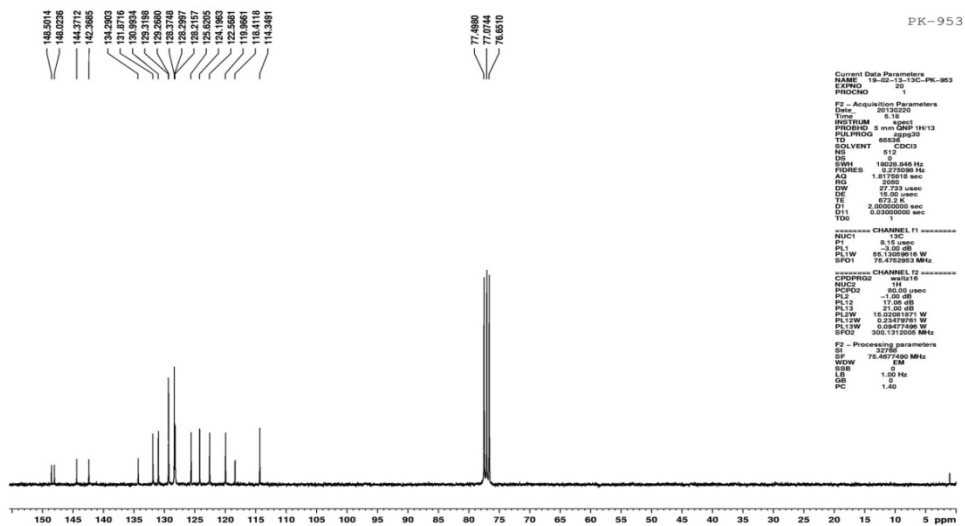

Figure 4:  $^{13}\text{C}$  NMR of compound (4a)

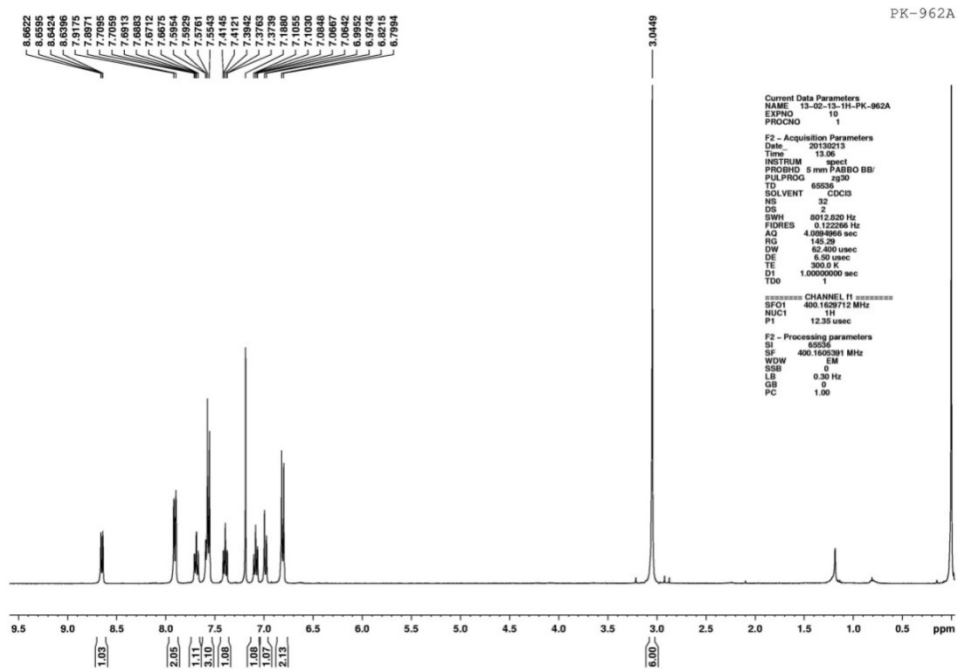

Figure 1: <sup>1</sup>H NMR of compound (4b)

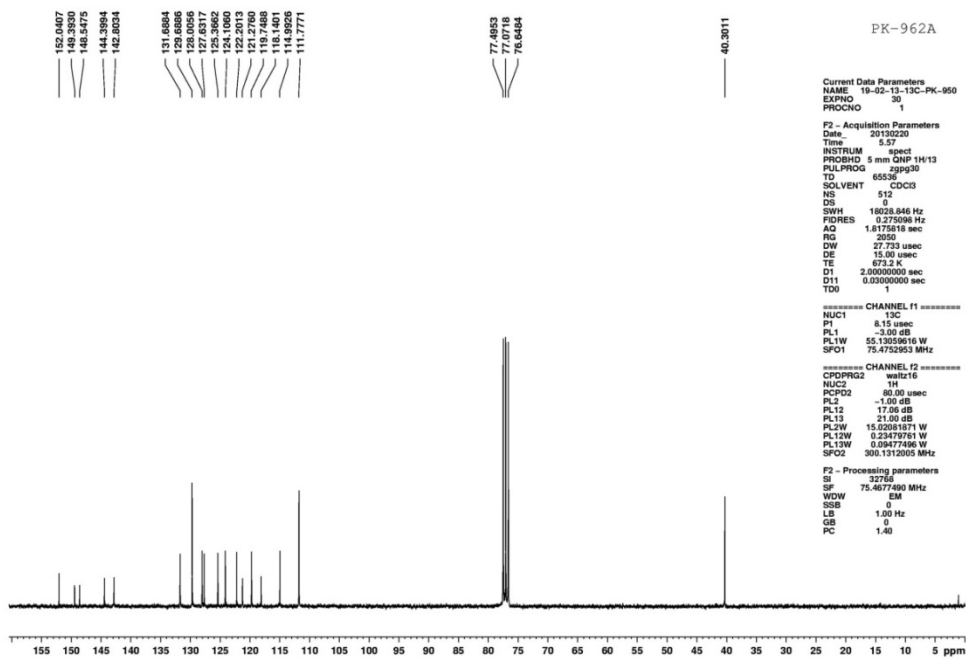

Figure 2: <sup>13</sup>C NMR of compound (4b)

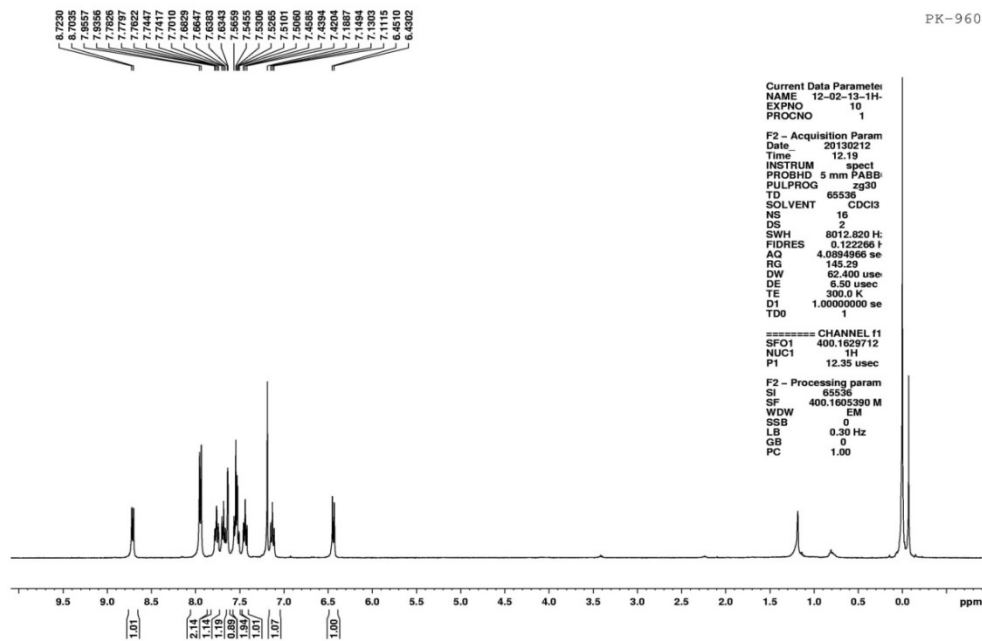

Figure 5: <sup>1</sup>H NMR of compound (4c)

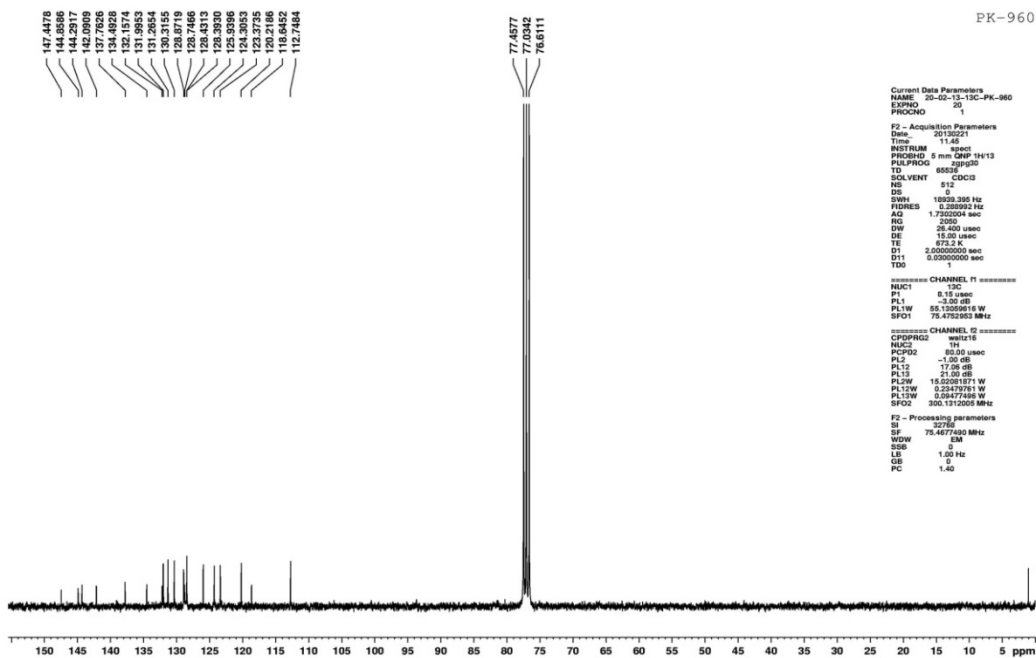

Figure 6: <sup>13</sup>C NMR of compound (4c)

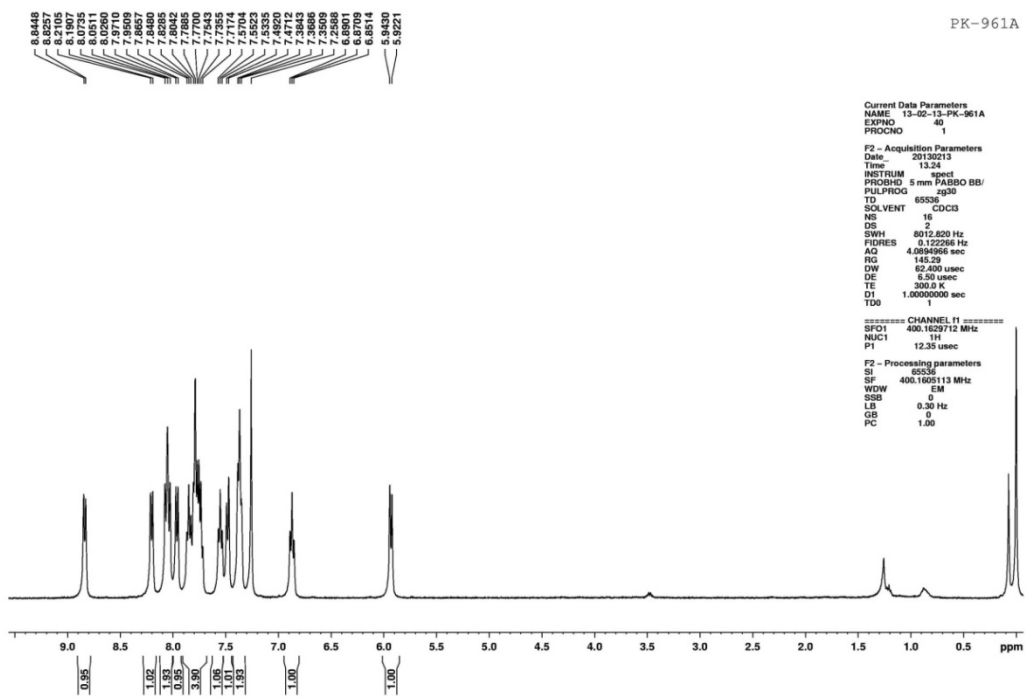

Figure 7: <sup>1</sup>H NMR of compound (4d)

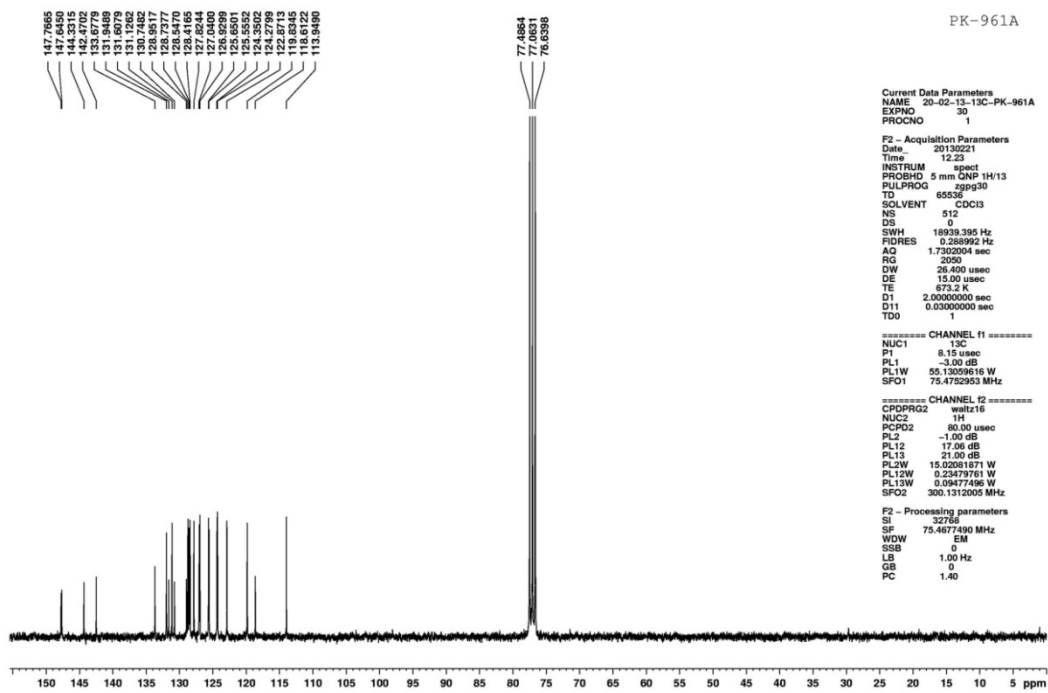

Figure 8: <sup>13</sup>C NMR of compound (4d)

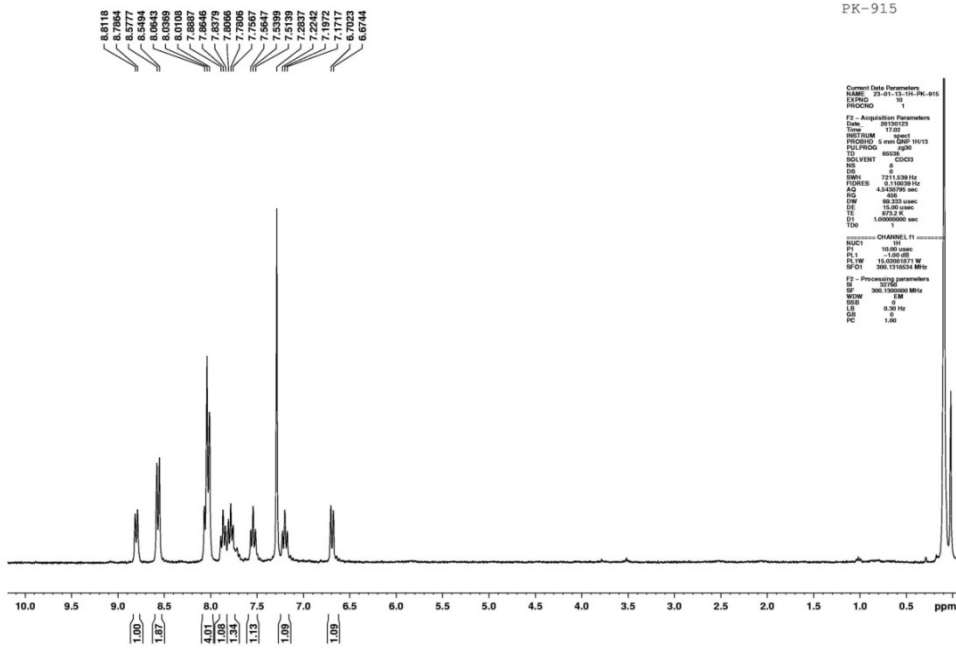

Figure 9: <sup>1</sup>H NMR of compound (4e)

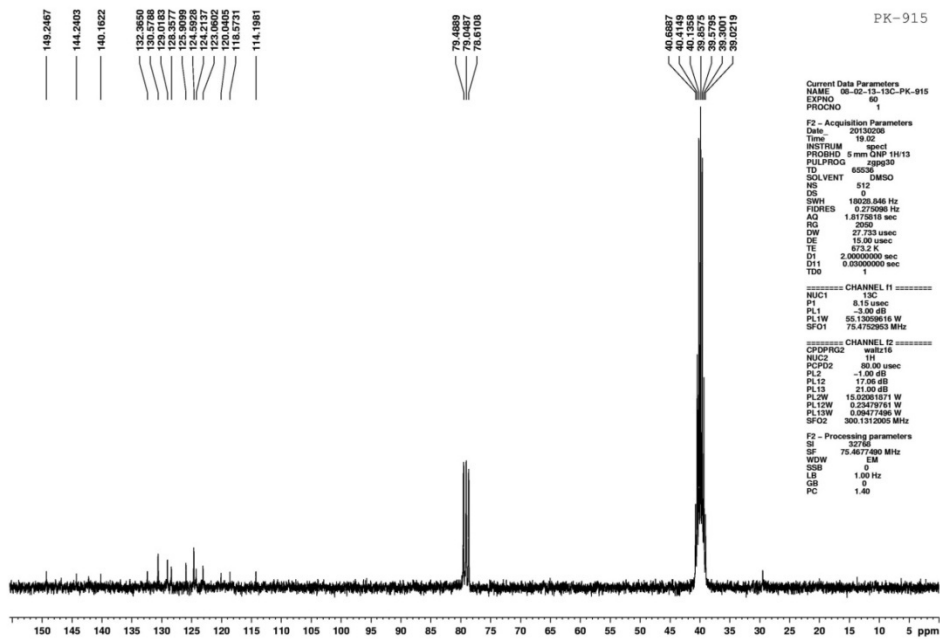

Figure 10: <sup>13</sup>C NMR of compound (4e)

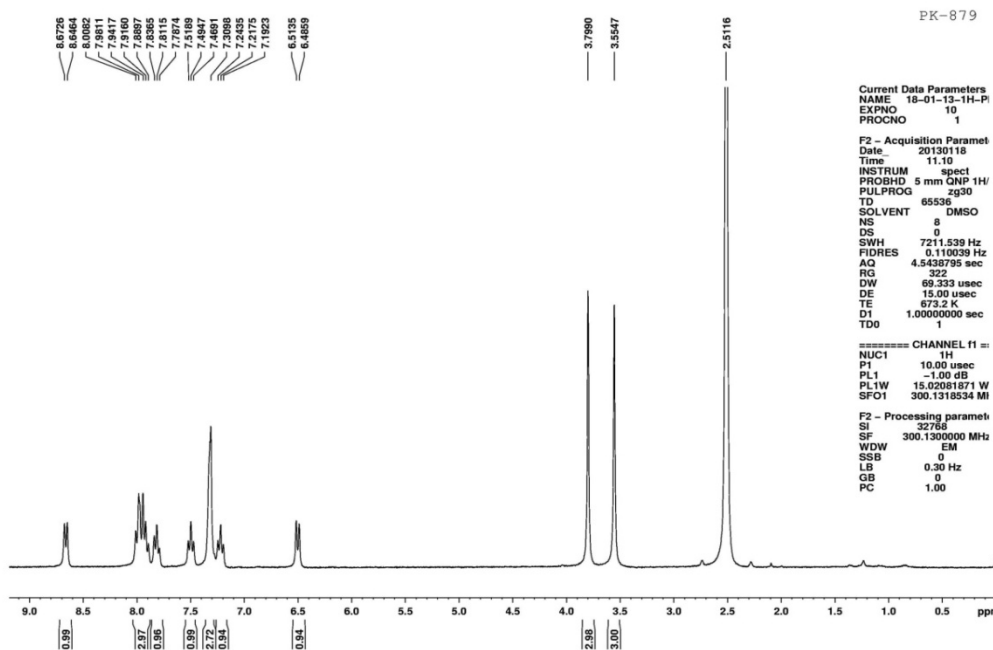

Figure 11:  $^1\text{H}$  NMR of compound (4f)

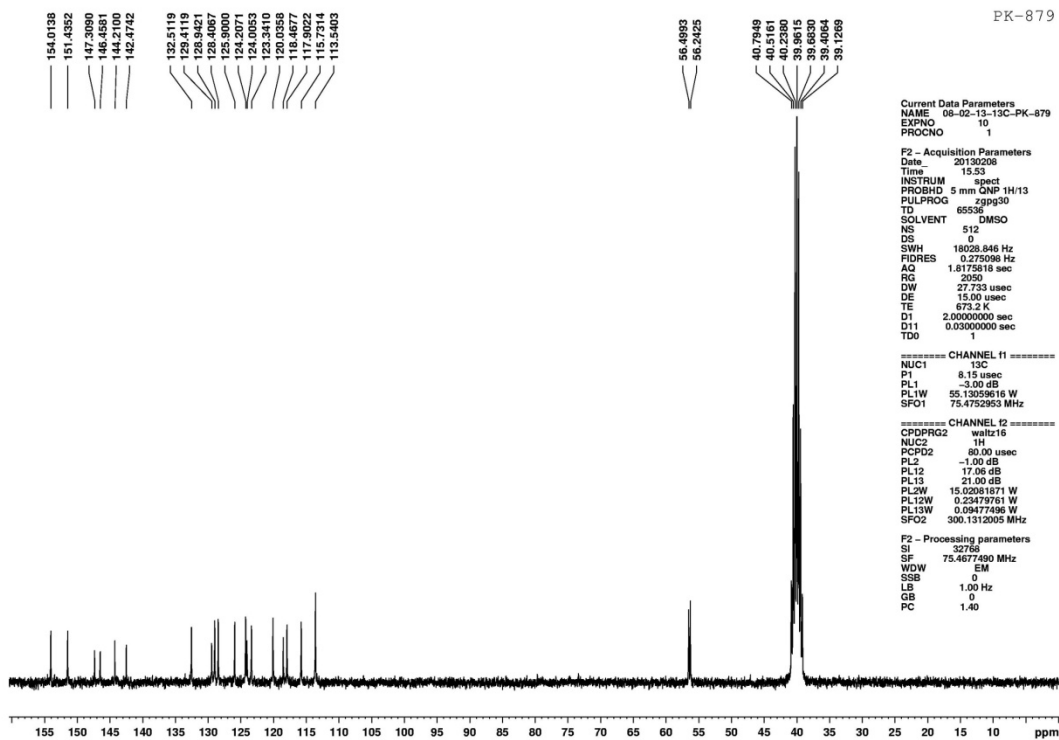

Figure 12:  $^{13}\text{C}$  NMR of compound (4f)

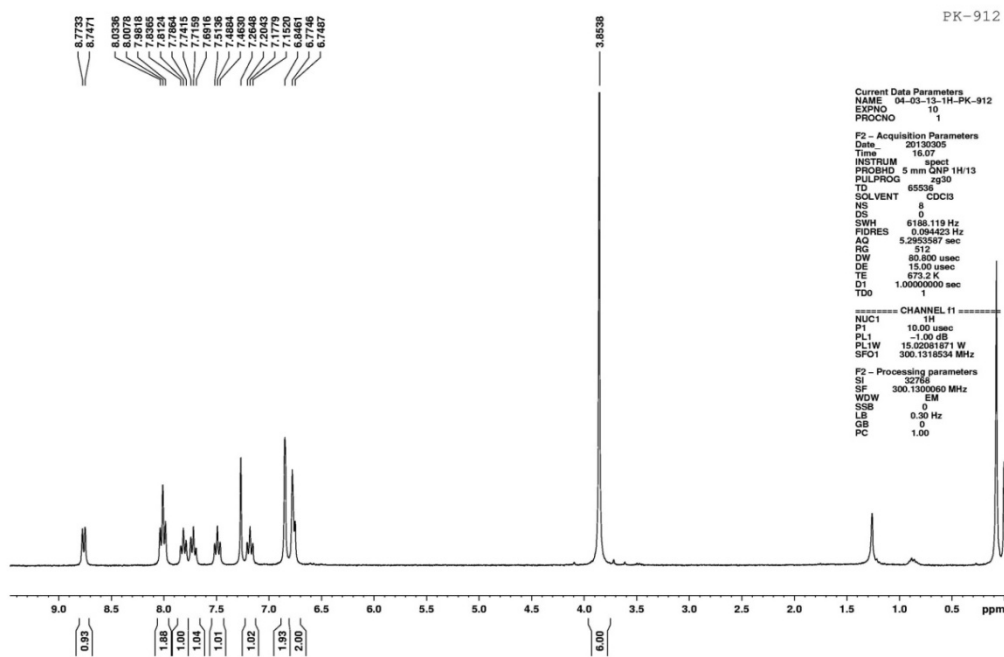

Figure 13: <sup>1</sup>H NMR of compound (4g)

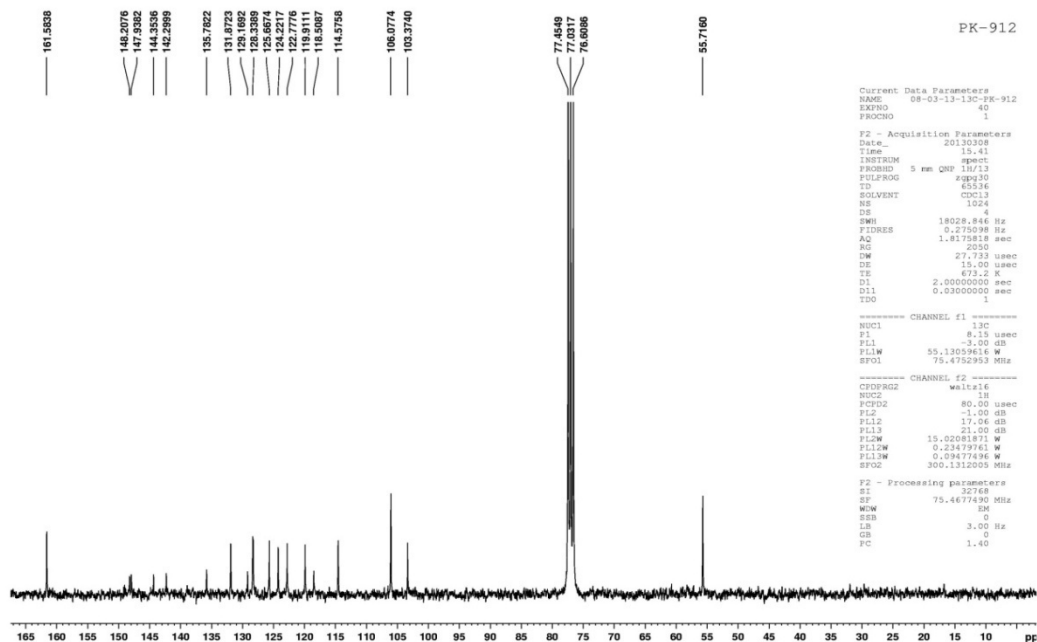

Figure 14: <sup>13</sup>C NMR of compound (4g)

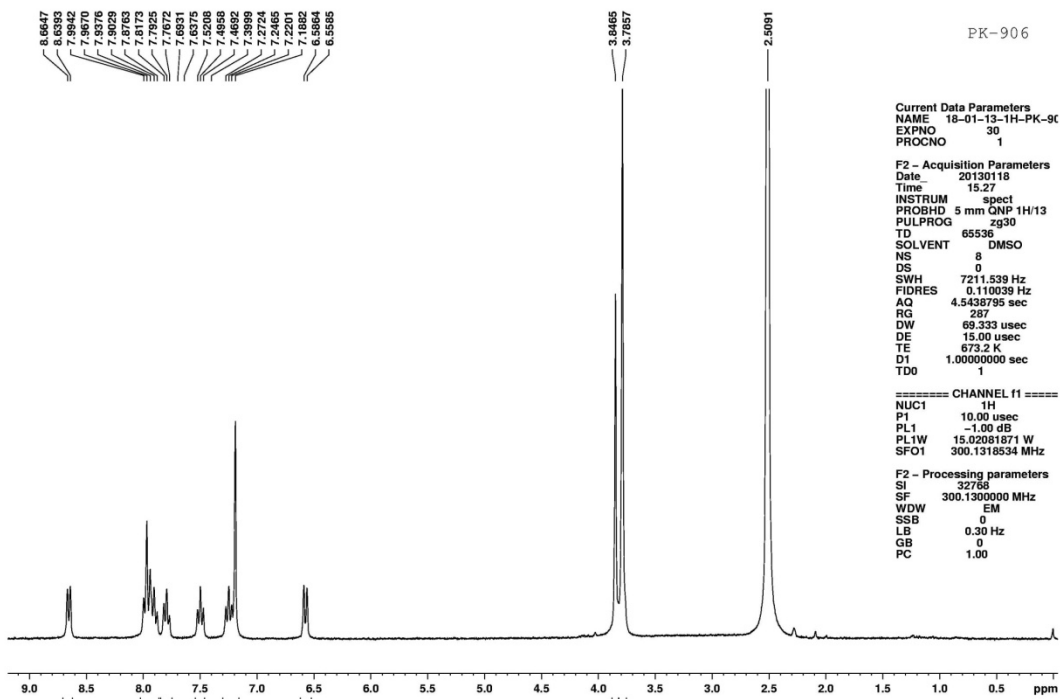

Figure 15: <sup>1</sup>H NMR of compound (4h)

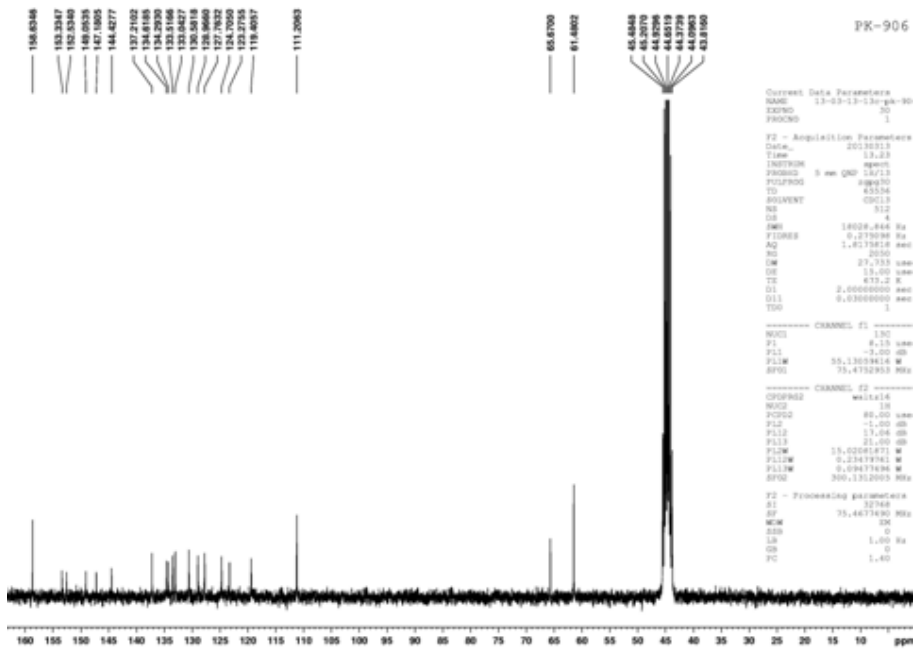

Figure 16: <sup>13</sup>C NMR of compound (4h)



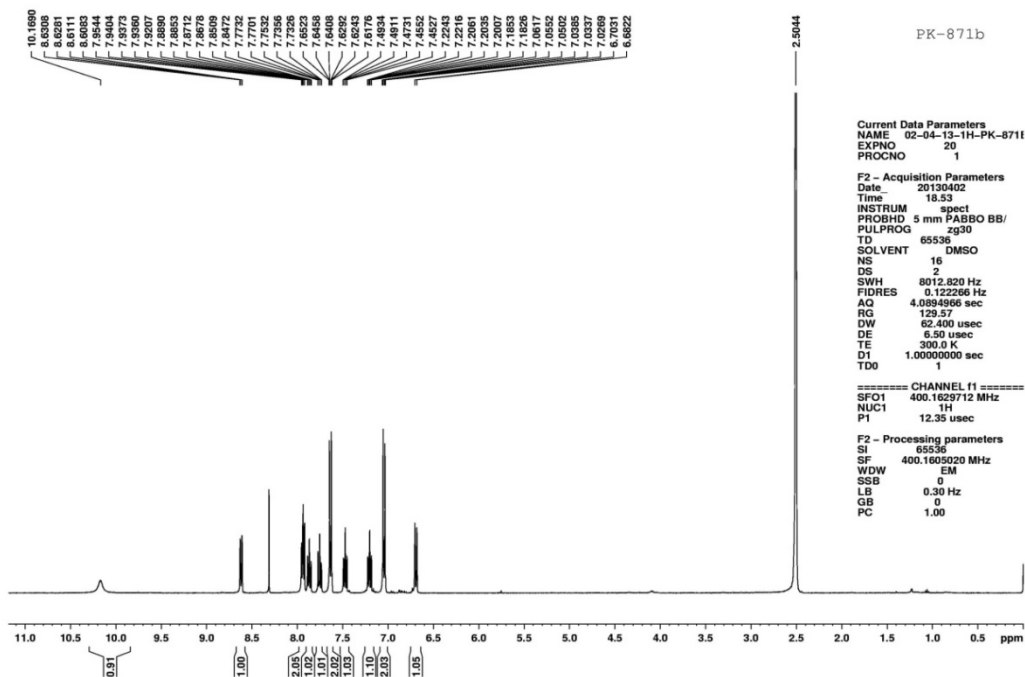

Figure 17:  $^1\text{H}$  NMR of compound (4i)

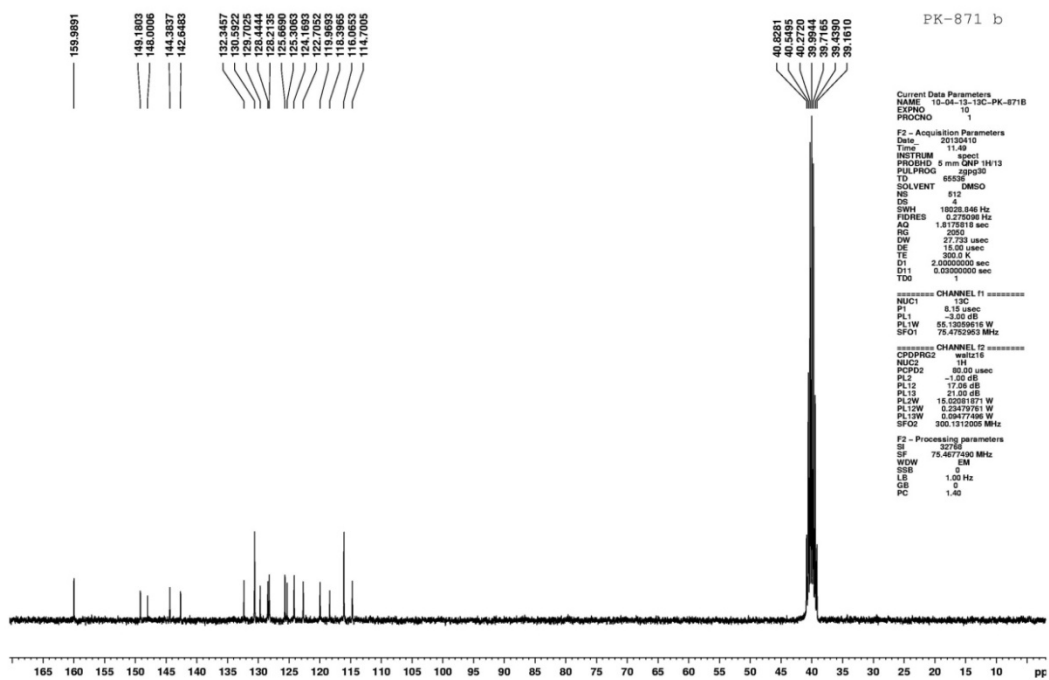

Figure 18:  $^{13}\text{C}$  NMR of compound (4i)

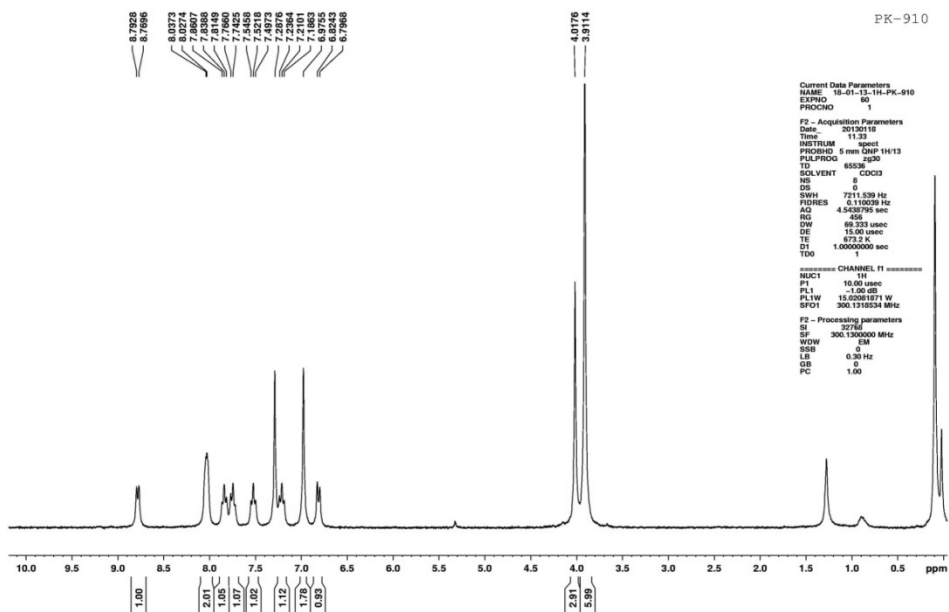

Figure 19: <sup>1</sup>H NMR of compound (4j)

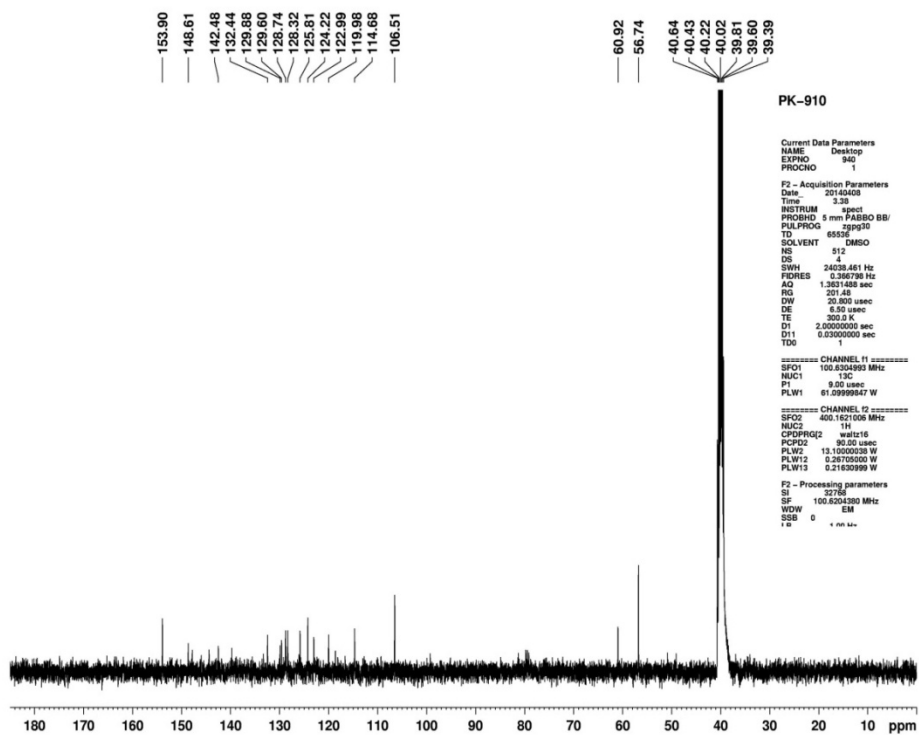

Figure 20: <sup>13</sup>C NMR of compound (4j)

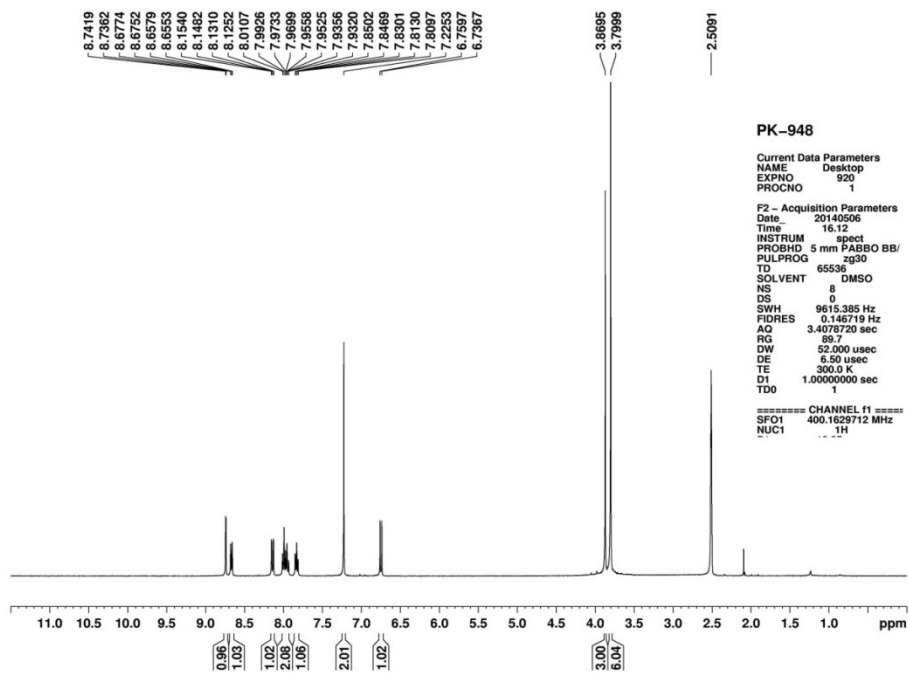

Figure 21: <sup>1</sup>H NMR of compound (4k)

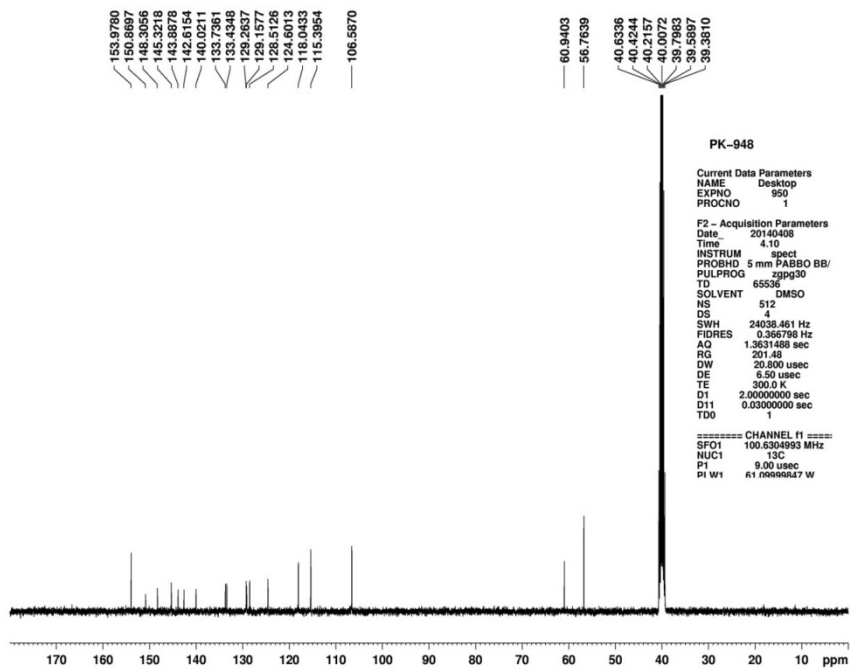

Figure 22: <sup>13</sup>C NMR of compound (4k)

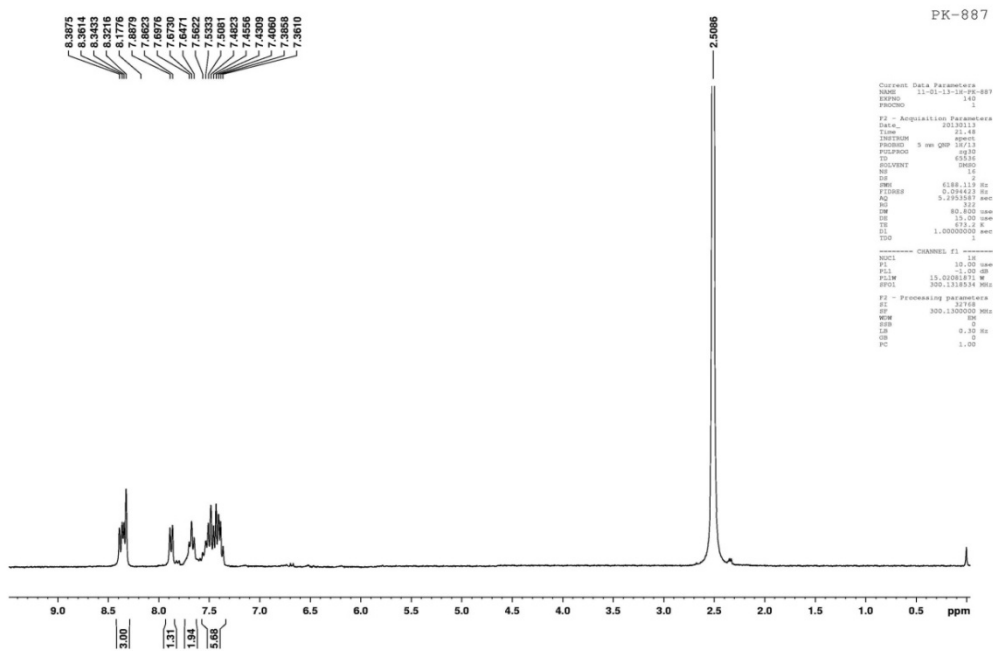

Figure 23: <sup>1</sup>H NMR of compound (4l)

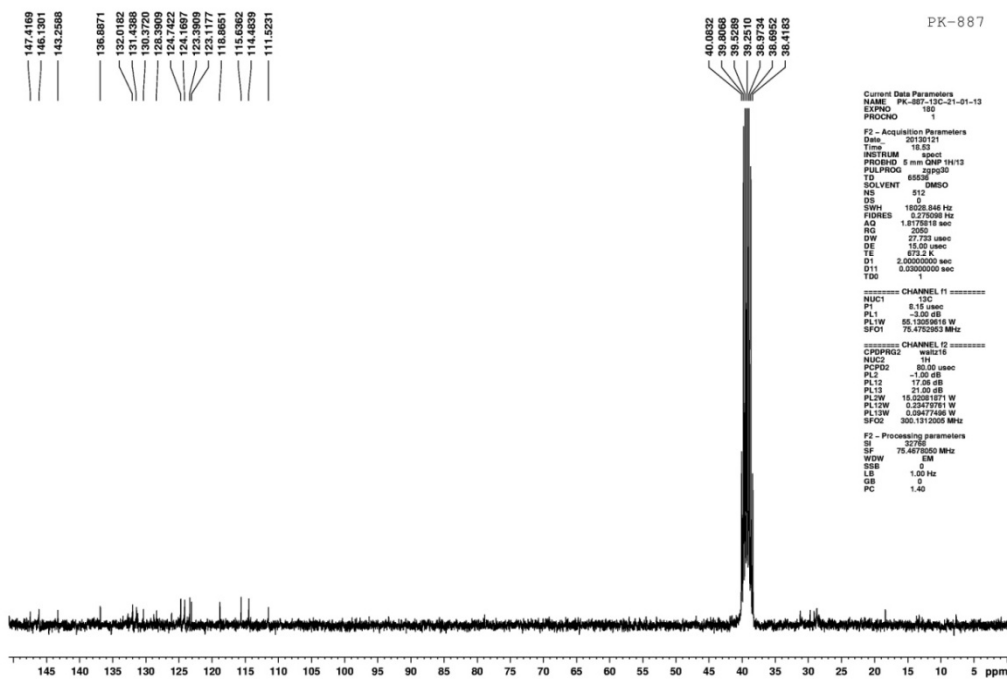

Figure 24: <sup>13</sup>C NMR of compound (4l)

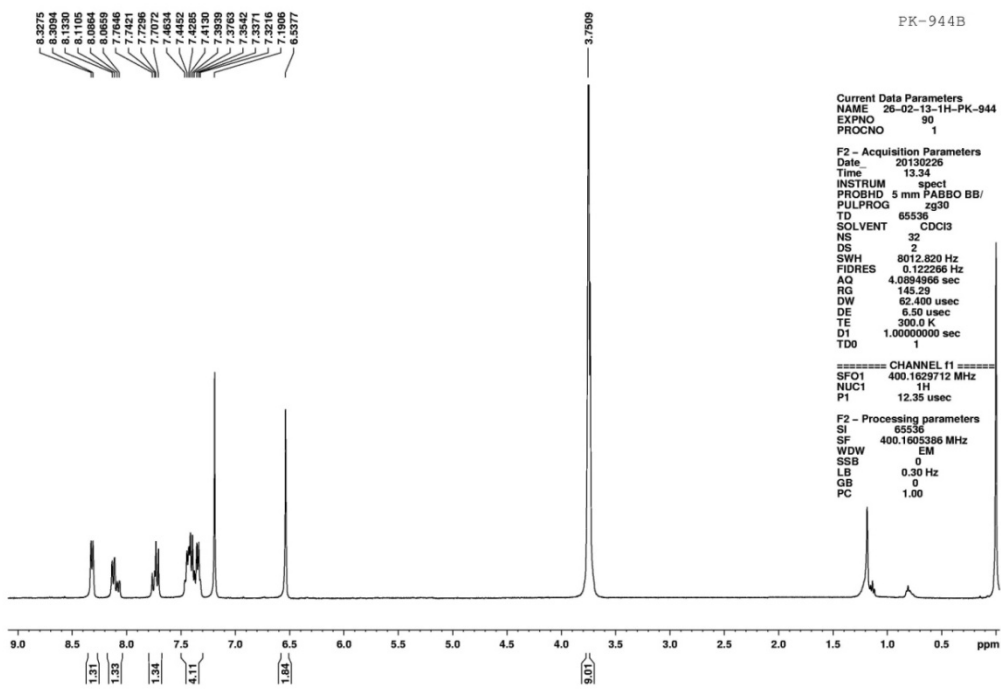

Figure 25: <sup>1</sup>H NMR of compound (4m)

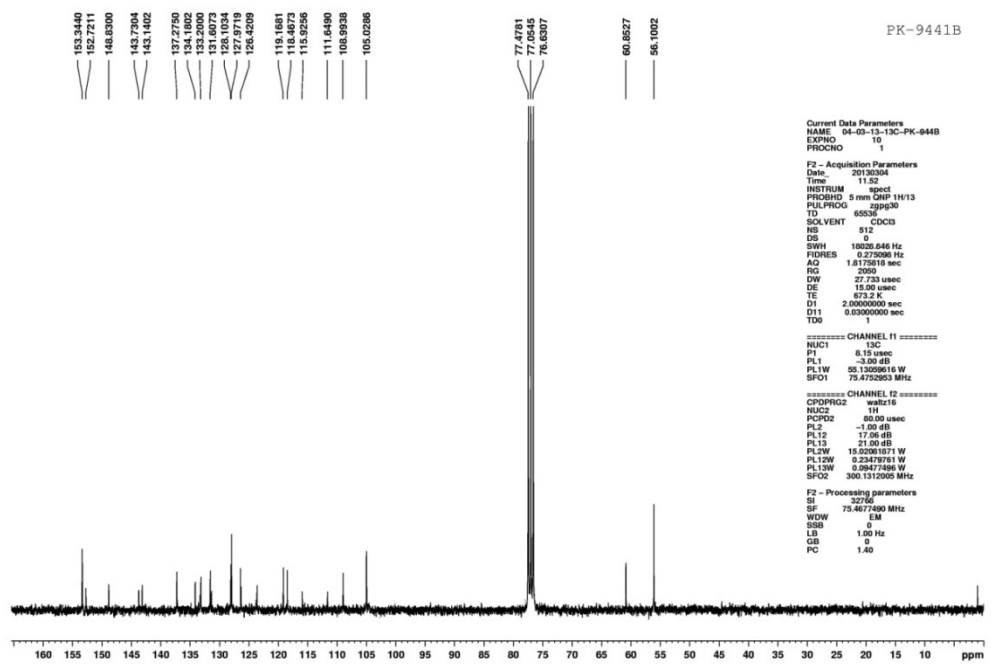

Figure 26: <sup>13</sup>C NMR of compound (4m)

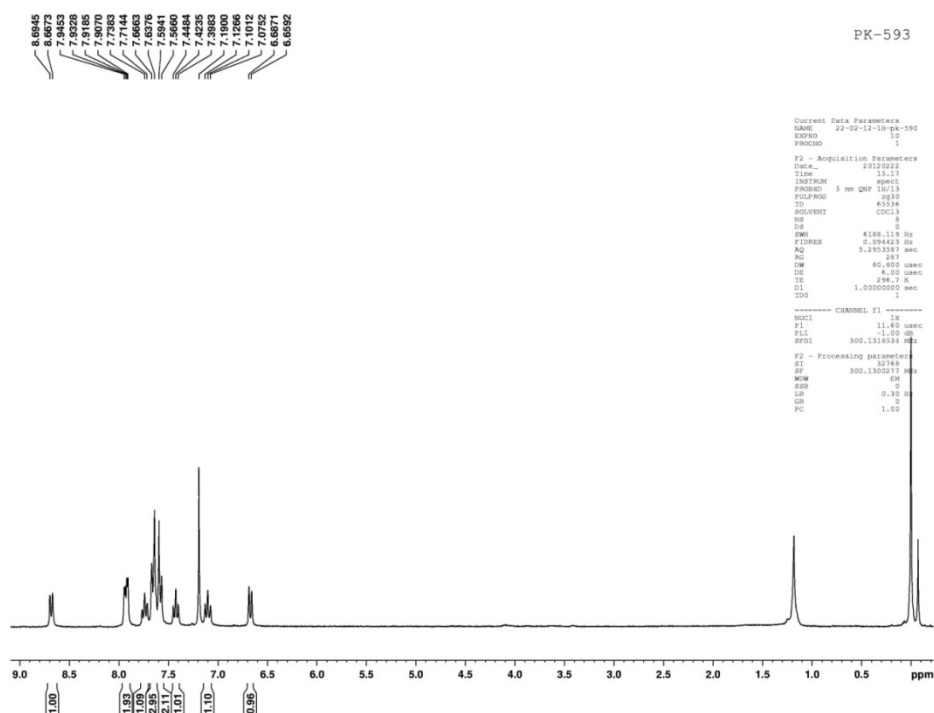

Figure 27:  $^1\text{H}$  NMR of compound (4n)

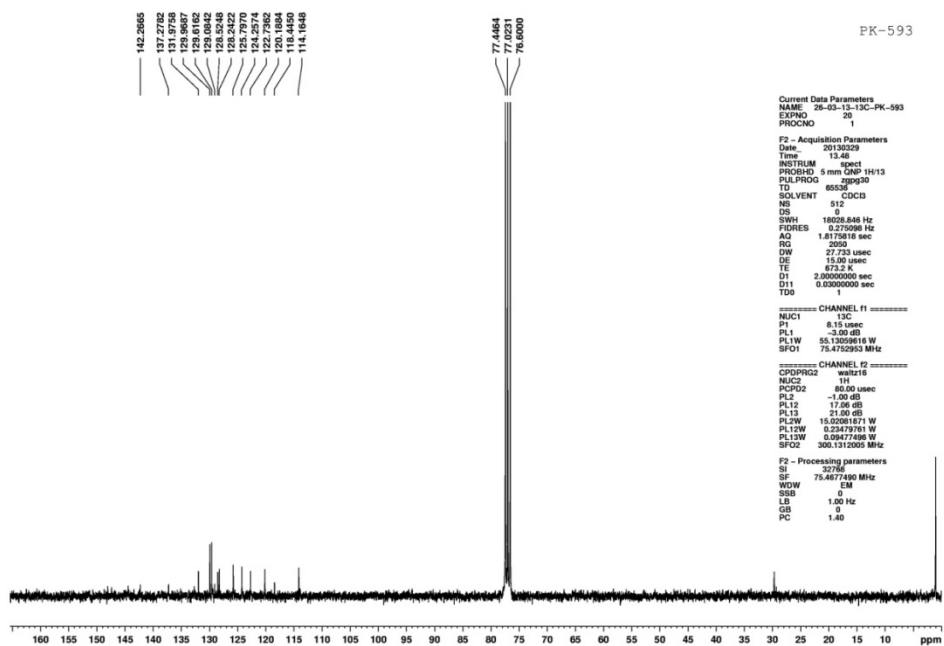

Figure 28:  $^{13}\text{C}$  NMR of compound (4n)

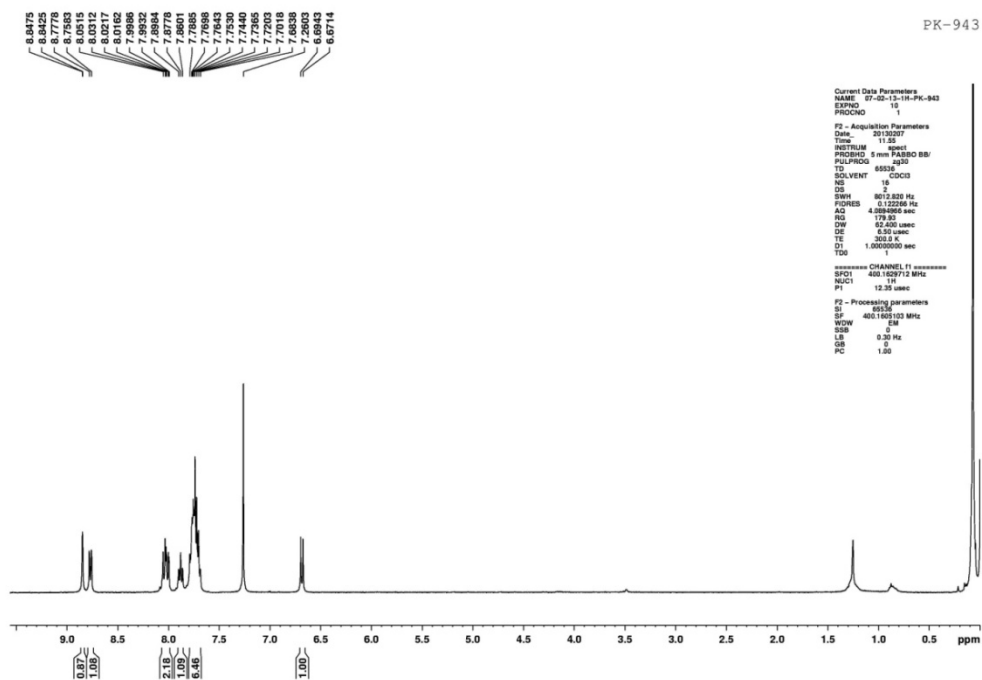

Figure 29 <sup>1</sup>H NMR of compound (40)

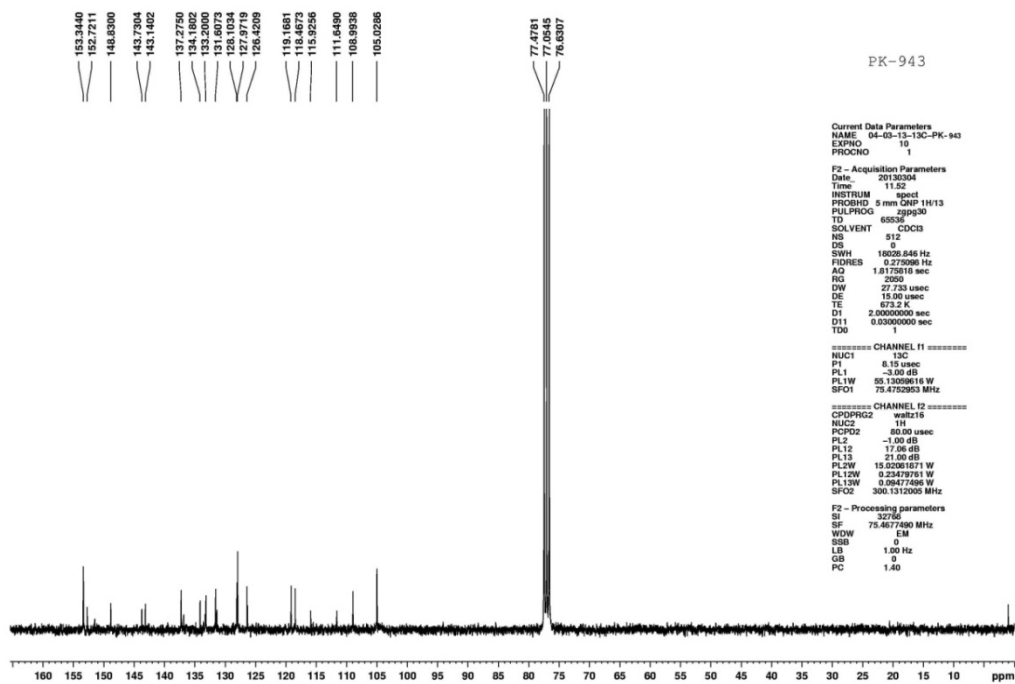

Figure 30: <sup>13</sup>C NMR of compound (40)
